# Supplementary material
Source: publisher figshare collection journal article supplement (https://gsajournals.figshare.com/ndownloader/files/13669532)
Supplement: Supplementary file 1 [file 13669532]

**Table S10. The variance and covariance of allele frequency change in simulations with truncation selection versus multiplicative selection. The base parameter set was used for the truncation model. For multiplicative selection, the selection coefficient was 0.133 at all 30 fitness determining loci. Statistics were calculated in each generation at all 291,272 SNPs for 1000 replicate simulation of each model. The last row reports the fractions of the variance in cumulative change (-) that can be attribute to the per generation variances versus the aggregate of among generation covariances.**

| Gen (i) | Multiplicative selection | | Truncation selection | |
| --- | --- | --- | --- | --- |
|  |  |  |  |  |
| 1 | 4.74E-05 |  | 5.80915E-05 |  |
| 2 | 5.34E-05 | 5.54E-06 | 6.22648E-05 | 1.87E-07 |
| 3 | 5.72E-05 | 9.43E-06 | 6.33615E-05 | 1.28E-06 |
| 4 | 6.07E-05 | 1.27E-05 | 6.41668E-05 | 2.07E-06 |
| 5 | 6.32E-05 | 1.58E-05 | 6.505E-05 | 2.87E-06 |
| 6 | 6.57E-05 | 1.85E-05 | 6.58774E-05 | 3.71E-06 |
| 7 | 6.74E-05 | 2.1E-05 | 6.66309E-05 | 4.56E-06 |
| 8 | 6.92E-05 | 2.32E-05 | 6.73869E-05 | 5.37E-06 |
| 9 | 7.01E-05 | 2.49E-05 | 6.84996E-05 | 6.4E-06 |
| 10 | 7.1E-05 | 2.64E-05 | 6.96189E-05 | 7.55E-06 |
| 11 | 7.11E-05 | 2.74E-05 | 7.08063E-05 | 8.93E-06 |
| 12 | 7.07E-05 | 2.77E-05 | 7.21472E-05 | 1.02E-05 |
| 13 | 6.95E-05 | 2.74E-05 | 7.4264E-05 | 1.19E-05 |
| 14 | 6.76E-05 | 2.65E-05 | 7.61278E-05 | 1.42E-05 |
|  |  |  |  |  |
| Sum | 9.04E-04 | 2.66E-04 | 9.44E-04 | 7.93E-05 |
| Total change | 3.30E-03 |  | 1.85E-03 |  |
| Proportion of total | 0.27 | 0.73 | 0.51 | 0.49 |
